# Supplementary material for: Type D Personality Is Associated with Psychological Distress and Poor Self-Rated Health among the Elderly: A Population-Based Study in Japan
Source: PubMed Central journal article supplement (PMC3798570; doi:10.1371/journal.pone.0077918), 2013-10-17
Supplement: pone.0077918.s001.pdf [file pone.0077918.s001.pdf]

Table S1. Demographic characteristics for the 960 participants whose missing data was imputed, Japan, 2010

| Characteristics                      | Men ( <i>n</i> = 385) | Women ( <i>n</i> = 575) |
|--------------------------------------|-----------------------|-------------------------|
|                                      | Number (%)            | Number (%)              |
| Age: mean [SD]                       | 76.6 [6.9]            | 78.2 [7.1]              |
| Smoking status                       |                       |                         |
| Never/Former                         | 319 (82.9)            | 571 (99.3)              |
| Current                              | 66 (17.1)             | 4 (0.7)                 |
| Frequency of alcohol consumption     |                       |                         |
| Never                                | 135 (35.1)            | 460 (80.0)              |
| 1–3/month                            | 50 (13.0)             | 63 (11.0)               |
| 1–6/week                             | 70 (18.2)             | 30 (5.2)                |
| Every day                            | 130 (33.8)            | 22 (3.8)                |
| Body mass index (kg/m <sup>2</sup> ) |                       |                         |
| Normal (<25)                         | 312 (81.0)            | 478 (83.1)              |
| Overweight (≥25)                     | 73 (19.0)             | 97 (16.9)               |
| Educational attainment               |                       |                         |
| Junior high school                   | 226 (58.7)            | 285 (49.6)              |
| High school                          | 129 (33.5)            | 254 (44.2)              |
| College or more                      | 30 (7.8)              | 36 (6.3)                |
| Socioeconomic status                 |                       |                         |
| High                                 | 31 (8.1)              | 48 (8.4)                |
| Middle                               | 204 (53.0)            | 290 (50.4)              |
| Lower middle                         | 114 (29.6)            | 177 (30.8)              |
| Low                                  | 36 (9.4)              | 60 (10.4)               |
| Number of cohabiters                 |                       |                         |
| 1 person (alone)                     | 46 (12.0)             | 140 (24.4)              |
| 2 persons                            | 166 (43.1)            | 184 (32.0)              |
| 3 persons                            | 62 (16.1)             | 92 (16.0)               |
| 4 persons or more                    | 111 (28.8)            | 159 (27.7)              |

SD: standard deviation
